1 MAPPING TRANSCRIPTION FACTOR NETWORKS BY COMPARING  
2 TF BINDING LOCATIONS TO TF PERTURBATION RESPONSES  
3  
4

5 Yiming Kang<sup>1,2,3</sup>, Nikhil R. Patel<sup>1,2,3</sup>, Christian Shively<sup>2,4</sup>, Pamela Samantha Recio<sup>2,4</sup>, Xuhua  
6 Chen<sup>2,4</sup>, Bernd J. Wranik<sup>5</sup>, Griffin Kim<sup>5</sup>, Robi Mitra<sup>2,4</sup>, R. Scott Mclsaac<sup>5</sup>, and Michael R.  
7 Brent<sup>2,3,6</sup>  
8

9 1. These authors contributed equally.

10 2. Center for Genome Sciences and Systems Biology, Washington University School of  
11 Medicine, St. Louis, MO 63110

12 3. Department of Computer Science and Engineering, Washington University, St. Louis, MO  
13 63108

14 4. Department of Genetics, Washington University School of Medicine, St. Louis, MO 63110

15 5. Calico Life Sciences LLC, South San Francisco, CA, 94080

16 6. Corresponding author  
17

18 Michael Brent

19 [brent@wustl.edu](mailto:brent@wustl.edu)

20 <http://mblab.wustl.edu>

21 314-660-2205

22 Campus Box 8510

23 Washington University

24 Saint Louis, MO 63130  
25

26 ABSTRACT

27 **Background:** A transcription-factor (TF) network map indicates the direct, functional targets of  
28 each TF -- the genes it regulates by binding to their cis-regulatory DNA. Data on the genomic  
29 binding locations of each TF and the transcriptional responses to perturbations of its activity,  
30 such as overexpressing it, could support TF network mapping. Systematic data sets of both  
31 types exist for yeast and for human K562 and HEK293 cells.

32 **Results:** In previous data, most TF binding sites appear to be non-functional, so one cannot  
33 take the genes in whose promoters a TF binds as its direct, functional (DF) targets. Taking the  
34 genes that are both bound by a TF and responsive to a perturbation of it as its DF targets  
35 (*intersection algorithm*) is also not safe, as we show by deriving a new lower bound on the  
36 expected false discovery rate of the intersection algorithm. When there are many non-functional  
37 binding sites and many indirect targets, non-functional sites are expected to occur in the cis-  
38 regulatory DNA of indirect targets by chance. Dual threshold optimization, a new method for  
39 setting significance thresholds on binding and response data, improves the intersection  
40 algorithm, as does post-processing perturbation-response data with NetProphet 2.0. A  
41 comprehensive new data set measuring the transcriptional response shortly after inducing  
42 overexpression of a TF also helps, as does transposon calling cards, a new method for  
43 identifying TF binding locations.

44 **Conclusions:** The combination of dual threshold optimization and NetProphet greatly expands  
45 the high-confidence TF network map in both yeast and human. In yeast, measuring the  
46 response shortly after inducing TF overexpression and measuring binding locations by using  
47 transposon calling cards improve the network synergistically.

48  
49 **Keywords:** transcriptional regulatory networks, transcription factors, gene expression,  
50 chromatin immunoprecipitation (ChIP), ChIP-Seq, TF perturbation, RNA-Seq, yeast, ENCODE

## 51 BACKGROUND

52

53 Mapping out the circuitry by which cells regulate gene expression is a fundamental goal of  
54 systems biology. Such maps would facilitate a broad spectrum of research programs, much as  
55 maps of intermediary metabolism and genome sequences have done. Transcriptional regulation  
56 has multiple layers and component types, including sensors and signal transduction cascades  
57 involving kinases, phosphatases, and other enzymes. The bottom layer of transcriptional  
58 regulation, which acts directly at the genome, features sequence-specific DNA binding proteins  
59 known as transcription factors (TFs). Signaling cascades often change the activity levels of  
60 specific TFs -- the extent to which they exert their regulatory potential on their target genes -- via  
61 mechanisms that affect TFs' abundance, localization, non-covalent interactions, or covalent  
62 modifications. To map and model transcriptional regulation as a whole, we must know which  
63 genes each TF regulates, or has the potential to regulate when activated.

64

65 A map of an organism's TF network would have powerful applications. It could be used to infer  
66 the effects of specific signals, drugs, or environments on the activity levels of TFs by analyzing  
67 their effects on gene expression [1-4]. It could be used to predict the significance of naturally  
68 occurring genome variants in TFs or TF binding sites (TFBS). And, it could be used to design  
69 genome edits in TFs or TFBS to achieve a desired transcriptional state or behavior [5-7]. Crucial  
70 to all of these applications is the distinction between the direct functional targets of a TF -- the  
71 genes it regulates because it binds to their cis-regulatory DNA -- and its indirect targets, which  
72 are regulated via intermediary proteins. For example, a mutation inactivating a binding site for a  
73 TF in the cis-regulatory DNA of one of its direct targets will generally modulate or eliminate the  
74 relationship between the TF and its direct target. However, a mutation in a non-functional  
75 binding site which happens to lie in the cis-regulatory DNA of an indirect target will not affect the  
76 relationship between the TF and its indirect target.

77

78 In this paper, we analyze previously published and newly described genome-wide data sets,  
79 using both standard and novel analytic techniques, to reveal the current state of the art in  
80 identifying the direct, functional targets of a TF (Table 1). The data sets we focus on are those  
81 that aim to determine the binding locations of TFs and those that attempt to measure the  
82 transcriptional response to perturbations of TF activity, such as over expressing the TF or  
83 deleting the gene that encodes it. The binding location data derive from either chromatin  
84 immunoprecipitation (ChIP) or transposon calling cards, while the perturbation data include  
85 expression profiles after deletion of TF-encoding genes, short-term induction of TF expression,  
86 TF knockdowns via small-interfering RNA (siRNA) or small-hairpin RNA (shRNA), or CRISPR  
87 interference (CRISPRi). Yeast data sets are more complete than those of any other eukaryote  
88 and yeast has a simpler genome with more localized regulatory DNA, so we start by focusing on  
89 yeast. In addition to evaluating data sets and experimental and analytic methods, we construct a  
90 preliminary map of the yeast TF network by integrating the best available binding and  
91 perturbation response data sets. For model invertebrates, there are large data sets on TF  
92 binding location [8, 9], but there are currently no comparable data sets on the responses to  
93 perturbations of TF activity. We analyze large data sets on human cell lines from the ENCODE

94 consortium [10, 11] and produce a preliminary, partial map of the TF network of human K562  
95 cells. We also analyze a large data set on Zinc Finger TFs in human HEK293 cells [12].

96  
97 Throughout most of this paper, we take the data sets at face value, assuming that they  
98 accurately report the molecular events they are designed to detect. An alternative explanation  
99 for some of our observations is that some data sets do not accurately report the events they are  
100 designed to detect. We do not take any position on that possibility nor do we mean to imply any  
101 judgment about it.

102  
103 We consider several approaches to identifying the direct functional (DF) targets of a TF from  
104 binding location and perturbation-response data. The simplest is to take the genes in whose  
105 regulatory DNA a TF binds as its DF targets. We show that this is unsatisfactory as most  
106 binding sites for most TFs appear to be non-functional, according to existing data. We then  
107 consider taking the genes that are both bound by a TF and responsive to a perturbation of it as  
108 its DF targets, an approach we refer to as the intersection algorithm. We show, by means of a  
109 newly derived lower bound on the expected false discovery rate of the intersection algorithm,  
110 that it is unsatisfactory when applied to previously published data sets. Next, we introduce dual  
111 threshold optimization, a simple, new method for setting significance thresholds on binding and  
112 response data that improves the performance of the intersection algorithm. We then show,  
113 using a large, new perturbation-response data set, that measuring the response a short time  
114 after inducing the perturbation gives better results than measuring the steady-state response in  
115 a TF deletion strain. Next, we demonstrate that post-processing gene expression data through  
116 NetProphet 2.0 [13], a network inference algorithm, results in better agreement with binding  
117 data than using raw perturbation-response. Finally, we show that transposon calling cards, a  
118 recently developed method for identifying TF binding locations, improves the performance of the  
119 intersection algorithm greatly, especially when it is combined with rapid measurement of  
120 perturbation responses.

121  
122 RESULTS

123  
124 Simple comparison of yeast ChIP-chip to expression profiles of TF deletion strains yields few  
125 high-confidence regulatory relationships

126 *Comprehensive binding and perturbation response data sets are available for yeast TFs* In  
127 2004, Harbison et al. assayed the binding locations of essentially all yeast TFs by using ChIP-  
128 chip [14]. They identified many binding sites, but it was not possible at that time to estimate how  
129 many of them were functional, in the sense that the binding caused the TF to regulate the  
130 downstream gene. In 2007, Hu et al. published a data set in which all non-essential yeast TFs  
131 were deleted and the resulting deletion strains were subjected to expression profiling [15]. This  
132 made it possible for the first time to estimate the fraction of binding events that are functional,  
133 and Hu et al. remarked on how surprisingly small that fraction is -- about 3-5% in their data. In  
134 2014, Kemmeren et al. published a second such data set, which benefited from newer  
135 technology and the hindsight afforded by the earlier study [16]. In the remainder of this paper,  
136 we focus on the Kemmeren TF knockout (TFKO) data because it demonstrates somewhat  
137 better agreement with the Harbison ChIP data, on average. We consider 183 yeast TFs with

138 DNA binding domains and 5,887 genes that are labeled “verified” or “uncharacterized” in  
139 Saccharomyces Genome Database (SGD), omitting those that are labeled “dubious ORFS”.

140  
141 *Most bound genes in the Harbison ChIP data are not responsive in the TFKO data.* We began  
142 this analysis by calculating the response rate of bound genes, for each TF -- the fraction of  
143 bound genes that are differentially expressed in the TFKO strain, relative to the wild type (WT).  
144 The spotted microarrays used by Harbison et al. in their ChIP-chip study contained one probe  
145 for each promoter, so their analysis yielded a simple P-value for whether each promoter is  
146 bound, with no further localization information. We eliminated from further consideration the 16  
147 TFs that were not called as bound to any promoter. For the TFKO data, we used the authors’  
148 statistical analysis and considered a gene to be differentially expressed in the TFKO strain,  
149 relative to the wild type strain, if its p-value (adjusted for multiple comparisons) was < 0.05. We  
150 eliminated from further consideration any TF whose knockout resulted in no significant changes  
151 as well as the 32 TFs whose microarray-reported expression level in the strain lacking the TF  
152 was more than one half its reported level in the WT. This can happen when the wild-type  
153 expression level of the TF is near or below the detection limit of the microarray.

154  
155 Fig. 1A shows a histogram of the results. The median response rate for bound genes was 18%.  
156 The mode was 0% -- 25 of the 97 TFs (26%) had both bound targets and responsive targets,  
157 but none of the bound targets were responsive. Only 17 TFs (18%) had a response rate above  
158 50%. This is without requiring a minimum fold change, to filter for biologically significant  
159 responses. With a minimum fold change of 1.5, the number of TFs for which more than half the  
160 bound genes are responsive drops to 4 (4%; Fig. S1A). Tightening the significance threshold for  
161 binding to  $P < 10^{-5}$  with no minimum fold change for response increases the median response  
162 rate to ~28%, but at the cost of reducing the total number of bound and responsive genes,  
163 summed over all TFs, to 297 (Fig. S1A-C). Thus, these data do not support the notion that most  
164 binding is functional. The low response rate of bound genes cannot be explained by saying that  
165 the TFs are inactive in the conditions tested, since the median number of genes that respond  
166 with  $p < 0.05$  is 321 (13 with fold-change >1.5). A lot of genes respond, they’re just not the same  
167 ones that are bound.

168  
169 *Many genes that are both bound and responsive in previously published data are probably not*  
170 *DF targets.* Given that available data suggest most binding sites are non-functional, a logical  
171 procedure for finding the DF targets is to choose those that are. In other words, to take the  
172 intersection of the genes bound by each TF with the genes that respond to a perturbation of that  
173 TF. It is important keep in mind, however, that most responsive genes are not bound.  
174 Comparing the ChIP data with the TFKO data, the median fraction of responsive genes that are  
175 bound is 1% (Fig. 1B). Thus, most of the responsive genes are indirect targets. Furthermore, it  
176 is reasonable to assume that the distribution of indirect targets among all genes is independent  
177 of the distribution of non-functional binding sites (Fig. 1C). Or at least that non-functional binding  
178 sites do not systematically avoid the promoters of indirect targets. This suggests that some of  
179 the indirect targets also have non-functional binding sites. These genes would be false positives  
180 of the intersection algorithm -- genes that are bound and responsive, but are not responsive  
181 *because they are bound.*

182  
183 In Box 1, we derive a lower bound on the expected false discovery rate (FDR) of the intersection  
184 procedure, as a function of the number of bound genes,  $|B|$ , the number of responsive genes,  
185  $|R|$ , the number of bound and responsive genes,  $|B \cap R|$ , and the total number of genes,  $|G|$ . The  
186 lower bound also depends on the sensitivity of the intersection procedure -- the fraction of direct  
187 functional targets that are in the intersection. The formula shows that, if a large fraction of bound  
188 genes are not responsive and a large fraction of responsive genes are not bound, the  
189 intersection procedure cannot have both high sensitivity and low false-discovery rate. For  
190 example, Fig. 2A shows the relationship between sensitivity and expected FDR for a fairly  
191 typical TF, Gln3, based on the Harbison ChIP data and the TFKO response data. A reasonable  
192 minimum accuracy criterion for a procedure aimed at finding the DF targets of a TF is that it  
193 have sensitivity  $\geq 80\%$  (it detects at least 80% of the DF targets) and an FDR  $\leq 20\%$ .  
194 However, that is not possible for Gln3, using these two data sets. Intuitively, this is because the  
195 fraction of Gln3-bound genes that are responsive to the Gln3 perturbation (53%) is only a little  
196 more than the fraction of all genes that are responsive to the Gln3 perturbation (43%; Fig. 2B).  
197 The 80-20 criterion is achievable for only 43 TFs. Fig. S2 shows the cumulative fraction of TFs  
198 that have an FDR bound below a given level, assuming 80% sensitivity, at various significance  
199 thresholds for binding and response.

200  
201 The FDR lower bound is only a lower bound and does not guarantee any maximum FDR for the  
202 intersection algorithm. In fact, of the 43 TFs that could possibly achieve the 80-20 criterion in the  
203 ChIP-TFKO comparison, only 27 have an intersection that is significantly larger than would be  
204 expected by chance (hypergeometric  $P < 0.01$ , not adjusted for multiple testing). If we define  
205 "acceptable TF" to be one that could pass the 80-20 criterion and has a larger overlap between  
206 bound and responsive targets than would be expected for randomly selected gene sets, then  
207 there are 27 acceptable TFs with a total of 448 regulatory interactions involving 366 unique  
208 target genes. If we take this to be our network map, ~85% of TFs are not acceptable so they  
209 have no high confidence targets, while 94% of genes have no identifiable regulator. Clearly,  
210 using the simple intersection algorithm with just these two data sets is not producing anything  
211 like a complete network map.

212  
213 Comparing yeast ChIP-chip data to expression profiling shortly after TF induction enlarges the  
214 map.

215 Recently, Hackett et al. released a data set in which the expression of nearly every yeast TF  
216 was induced from a very low level to a high level [17]. This was accomplished by expressing  
217 ZEV, an estradiol-activated artificial TF, and replacing the promoter of the gene to be induced  
218 with a ZEV-responsive promoter [18, 19]. (Some of the TFs were induced using an earlier  
219 iteration of the artificial TF called GEV [20], but we refer to the data set as ZEV for  
220 convenience.) Gene expression profiles were measured before induction and at 5, 10, 15, 20,  
221 30, 45, and 90 minutes after inducing the expression of a natural yeast TF with estradiol. We  
222 reasoned that genes that respond rapidly might be enriched for direct targets of the induced TF,  
223 since there would be limited time for intermediary proteins to be transcribed and translated. If  
224 the responders were enriched for direct targets, the number of acceptable TFs might increase,  
225 expanding the network map. In general, the expression profiles taken 15 minutes after TF

226 induction (ZEV15) were most enriched for bound genes, so we focus on the 15-minute time  
227 point for the remainder of the paper. Specifically, among the 94 TFs available in Harbison ChIP  
228 and all ZEV time points, ZEV data at 15 minutes yielded the maximal number of acceptable TFs  
229 when compared to ChIP data (Fig. S3). We consider a gene to be responsive if its shrunken log  
230 fold change estimate, relative to time 0, was non-zero for details of the shrinkage analysis). A  
231 detailed description of these strains and expression profiling experiments can be found in ref.  
232 [17]

233  
234 The TF Gln3, which could not achieve 80% sensitivity with 20% expected FDR in the ChIP-  
235 TFKO comparison (Fig. 2A), can in the ChIP-ZEV15 comparison (Fig. 2C). The reason is that  
236 the number of responsive genes has decreased from 43% of all genes to 24%, at the same time  
237 that the response rate of bound genes *increased* from 53% to 60% (Fig. 2B, D). Across all TFs,  
238 the ChIP-ZEV15 comparison identified 37 acceptable TFs, 23 of which had not been identified  
239 in the ChIP-TFKO comparison (Fig.3A). Together, the ZEV15-ChIP and TFKO-ChIP  
240 comparisons yielded 50 acceptable TFs with a total of 930 regulatory interactions involving 722  
241 unique target genes. This network map is significantly expanded, but it is still the case that  
242 >72% of TFs are not acceptable and hence have no targets, while >87% of genes have no  
243 regulators.

#### 244 245 Dual threshold optimization expands the TF Network map

246 A possible limitation of the previous analyses is that they rely on statistical significance  
247 thresholds to determine which genes are bound and which are responsive. The statistics are  
248 calculated separately for the binding and response data sets and statistical significance  
249 threshold are, by their nature, arbitrary. Furthermore, statistically significant levels of binding or  
250 perturbation response might not be biologically significant. For example, a TF may bind a site  
251 consistently in the ChIP data even though the fractional occupancy of the site is too low to  
252 detectably affect transcription. To address these problems, we developed dual threshold  
253 optimization (DTO), a method that sets the binding and response thresholds by considering both  
254 data sets together. DTO chooses, for each TF, the pair of (binding, response) thresholds that  
255 minimizes the probability that the overlap between the bound and responsive sets results from  
256 random gene selection (Fig. 3C).

257  
258 For this analysis, we ranked all genes by their absolute log fold change in the ZEV15 data and,  
259 separately by their negative log P-value in the Harbison ChIP data. We could have used the  
260 underlying ChIP signal rather than its P-value, but in this case the P-value was more convenient  
261 (see below). The genes with the strongest evidence for binding or responsiveness were ranked  
262 at the top of the lists. We then chose the pair of (binding, response) rank thresholds so as to  
263 minimize the probability of the overlap between bound and responsive, under a null hypothesis  
264 of random selection of gene sets of the sizes determined by the thresholds (hypergeometric  
265 distribution). The only constraint on the thresholds chosen was that the P-value for the ChIP  
266 data could not exceed 0.1.

267  
268 To test the significance of the overlap at the chosen thresholds, we needed a null distribution for  
269 the results of running DTO on unrelated binding and response rankings. The null distribution for

270 randomly chosen, fixed-size sets does not apply because DTO chooses the bound and  
271 responsive set sizes specifically to minimize probability under the fixed-size null. To obtain the  
272 correct null, we randomly permuted the assignment of binding and response signals to genes  
273 1000 time for each pair of binding and response data and ran DTO on each random permutation  
274 (see Supplemental Methods for details).

275  
276 After DTO, we applied the same acceptability criteria as before -- the bound and responsive  
277 overlap must be significant ( $P < 0.01$ , permutation-based) and 20% FDR at 80% sensitivity must  
278 be achievable. DTO expanded the network map again (Fig. 3B). Combining the results of both  
279 response data sets, it yielded 58 acceptable TFs with a total of 1,829 regulatory interactions  
280 involving 1,236 unique target genes. Interestingly, the number of TFs that are acceptable in both  
281 data sets now exceeds the number that are acceptable in either of the data sets alone. In this  
282 map, ~32% of TFs have at least one target and ~21% of genes have at least one regulator. The  
283 maps based on DTO of TFKO and ZEV15 data are provided as Supplemental Files S1 and S2.

284  
285 Processing yeast gene expression data through NetProphet 2 further expands the map  
286 NetProphet 2.0 [13] is a network inference method that combines analysis of gene expression  
287 data, including expression data from perturbation-response experiments, with information  
288 gleaned from genome sequence. It assigns a score to each possible TF-target interaction and  
289 ranks all possible interactions according this score. A major component of the NetProphet score  
290 is the degree to which the target gene responds to direct perturbation of the TF. However, it also  
291 considers the degree to which the mRNA level of the TF is predictive of the mRNA level of the  
292 potential target, across many different perturbations. This analysis is not limited to single-TF  
293 perturbations -- it can also use perturbations of other genes, drugs, or growth conditions. As a  
294 result, it can make predictions about the targets of TFs that have not been individually  
295 perturbed. NetProphet also makes use of two other ideas: (1) that co-regulated genes tend to  
296 have similar sequence motifs in their promoters, and (2) that DNA binding domains with similar  
297 amino acid sequences tend to bind similar motifs. NetProphet 2.0 combines all these factors,  
298 but is primarily driven by gene expression data. It does not use ChIP or other experimental data  
299 on TF binding location.

300  
301 We built separate NetProphet networks using the TFKO and ZEV data (Methods). For TFKO,  
302 we input 3 wild-type expression profiles and the complete set of 1,484 expression profiles from  
303 strains lacking one gene -- some of the deleted genes encode TFs, but others encode other  
304 putative regulatory proteins, such as kinases and phosphatases. For ZEV, we used 590  
305 expression profiles from 15 minutes, 45 minutes, or 90 minutes post-induction. We then ranked  
306 the potential targets of each TF by their NetProphet scores and ran dual threshold optimization,  
307 treating the NetProphet score as we did the response strength.

308  
309 Combining the results from NetProphet applied to TFKO and NetProphet applied to ZEV, dual  
310 threshold optimization resulted in 84 acceptable TFs (Fig. 3D) with a total of 2,151 regulatory  
311 interactions (Fig. S4B) involving 1,326 unique target genes (Fig. S4A). The number of TFs that  
312 are acceptable in both data sets, 44, is now much larger than the number that are acceptable in



313 either data set alone (TFKO:22, ZEV:18). The total number of edges, combining both TFKO and  
314 ZEV data, is 2,151, of which 400 are supported by both data sets.

315  
316 Supplemental Files S3 and S4 contain the complete set of regulatory edges for each acceptable  
317 TF in each comparison, along with their NetProphet score rank (among all possible  
318 interactions), their Harbison ChIP P-value, and the probability of the TF's bound-responsive  
319 intersection under a hypergeometric null model. This may be the best network that can be  
320 obtained by using the comprehensive yeast ChIP-chip data. Network inference methods that do  
321 not consider binding data, such as NetProphet 2.0, may produce better networks on their own,  
322 but if support from binding data is required, this is the best we can do with these data sets. In  
323 this network, ~46% of TFs have at least one target and ~37% of genes have at least one  
324 regulator. Running NetProphet on gene expression data and feeding the result into dual  
325 threshold optimization has enlarged the map, but it is still smaller than what is generally  
326 expected for the complete yeast TF network. To improve on it further, we need binding data that  
327 is more focused on functional binding or simply more accurate. We will consider newer yeast  
328 binding data, produced by using new methods, after discussing ChIP-seq and perturbation  
329 response data on human cell lines.

330  
331 Without processing by NetProphet 2.0, data on human cell lines yields a few acceptable TFs.  
332 The ENCODE project [10] has produced a wealth of data on human cell lines, which currently  
333 includes 743 TF ChIP-Seq experiments and 391 RNA-Seq experiments following knockdown of  
334 a TF by siRNA or shRNA (TFKD) or repression of a TF by CRISPR interference (CRISPRi) [21].  
335 In this section, we refer to proteins as TFs if they were subjected to both ChIP-Seq and  
336 perturbation-response experiments and are listed as TFs in the ENCODE database; the  
337 question of which proteins are sequence-specific DNA binding proteins that regulate  
338 transcription rates is considered further in the Discussion. In K562 cells, 42 TFs have both  
339 ChIP-Seq and TFKD data and 45 TFs have both ChIP-Seq and CRISPRi data. In HepG2 cells  
340 16 TFs have both binding and TFKD data. We focus our investigation on K562 data, as it is by  
341 far the biggest relevant data set.

342  
343 We considered two ways of assigning ChIP-Seq peaks to the genes they potentially regulate.  
344 The first is the traditional approach of choosing an interval around the transcription start site  
345 (TSS) -- we used 10 kb upstream to 2 kb downstream. The second is to take a small proximal  
346 promoter region (TSS -500 bp to +500 bp) along with enhancer regions that have been  
347 identified and assigned to the target gene in the GeneHancer database [22]. GeneHancer uses  
348 a variety of data types including predicted and ChIP-based TF binding sites, enhancer RNAs,  
349 histone marks, chromosome conformation, and cis-EQTLs. We used only the 'elite' enhancers  
350 and 'elite' associations, each of which are supported by at least two sources of evidence. In  
351 order to be comprehensive, we used all elite enhancers and enhancer-gene associations,  
352 regardless of the cell lines or tissue types in which the evidence was obtained. However, 91% of  
353 the 'elite' enhancers were supported by evidence from ENCODE, much of which comes from  
354 the same K562 cell line used for the binding and perturbation-response studies. The enhancer-  
355 based approach generally gave 1 or 2 more acceptable TFs than the fixed interval, so we used  
356 that in subsequent analyses.

357  
358 Unlike the yeast array-based data, the human sequencing-based data tended to yield many  
359 more bound than responsive genes (Fig. 4A, B). Among the TFs that had at least one bound  
360 and one responsive gene, 7 (TFKD) and 7 (CRISPRi) had no genes that were both bound and  
361 responsive. The median response rate for bound genes was <0.5%. In a fixed-threshold  
362 comparison to K562 ChIP-Seq data with adjusted  $P < 0.05$ , TFKD and CRISPRi produced 5  
363 acceptable TFs each. We then ran dual threshold optimization limiting the bound and  
364 responsive gene sets to have  $P \leq 0.1$ ; such limits are necessary because DTO occasionally  
365 chooses implausible thresholds, such as counting all genes as responsive. DTO increased the  
366 number of acceptable TFs slightly, to 6 and 6. In these data sets, all TFs that failed the 80-20  
367 FDR criterion also failed the overlap  $P < 0.01$  criterion, so the results would be the same without  
368 the FDR criterion. However, all TFs would have failed if we had required 80% sensitivity and  
369  $FDR \leq 10\%$ . Of the total number of TFs with both binding and response data, TFKD yielded  
370 14% acceptable TFs (6/43) and CRISPRi yielded 13% (6/45).

371  
372 We also analyzed a data set on 88 human GFP-tagged C2H2 Zinc Finger TFs with matched  
373 Chip-Seq data and response-to-overexpression data in HEK293 cells [12]. Chip-Seq was  
374 carried out using an antibody against GFP and RNA-Seq was carried out 24 hours after  
375 overexpressing the TF from a tetracycline-inducible plasmid. For the majority of TFs there was  
376 only a single replicate of the RNA-Seq experiment, which prevents the calculation statistical  
377 significance by traditional methods. However, we were able to carry out DTO using the absolute  
378 log fold-change in the single replicate (relative to the median expression in all perturbations) as  
379 the measure of response strength. Seven of the 88 TFs were acceptable in this analysis, but  
380 DTO chooses all genes as responsive for five of the seven. When we limited the total number of  
381 responsive genes to 300,000, or 3409 per TF on average, three TFs were acceptable and none  
382 had more than 1,000 responsive genes.

383  
384 Processing human data through NetProphet 2.0 greatly increases the number of acceptable  
385 TFs.

386 We ran NetProphet 2.0 on both the K562 data (TFKD and CRISPRi) and the HEK293 data  
387 described above (see Supplemental Methods for details). We then ran DTO limiting the total set  
388 of responsive genes to those with the top 500,000 (K562) or 300,000 (HEK293) NetProphet  
389 scores. NP can infer targets for TFs that have not been directly perturbed by exploiting  
390 correlation between the expression of the TF and its targets (among other factors), so we were  
391 able to calculate NP scores for 262 ChIPed TFs (K562) or 103 ChIPed TFs (HEK293). This  
392 greatly increased the number of acceptable TFs to 64 for K562 TFKD (24%) and 56 for K562  
393 CRISPRi (21%; Fig. 4C). For HEK293, DTO on NetProphet scores increased the number of  
394 acceptable TFs to 60 of the 103 that were chipped (58%).

395  
396 More recent yeast ChIP data does not yield as many acceptable TFs as the Harbison data  
397 The ChIP data published by Harbison et al. in 2004 is still the only data set of binding locations  
398 of most or all yeast TFs. However, Venters et al. [23] carried out ChIP-chip on a set of proteins  
399 they termed chromatin factors, 25 of which were also chipped by Harbison and perturbed by  
400 TFKO and ZEV. We carried out dual threshold optimization on these 25 common TFs,

401 comparing the two ChIP binding data sets to the TFKO and ZEV perturbation data sets, with  
402 and without post-processing by NetProphet 2.0. The older Harbison ChIP data produced more  
403 acceptable TFs than the Venters data, when compared to either TFKO or ZEV, either with or  
404 without NetProphet (Fig. 5A). Thus, the age of the Harbison ChIP data does not seem to be a  
405 significant limitation.

406

#### 407 ChIP-exo yields more acceptable TFs than traditional ChIP

408 We also ran NetProphet and DTO on a small set of TFs for we could obtain binding data from  
409 ChIP-exo, a variant of the ChIP method in which the affinity-purified chromatin is digested by  
410 DNase, leaving a much smaller piece that is partially protected by protein. Seven TFs had data  
411 in ChIP-exo, Harbison, TFKO, and ZEV, enabling all-way comparisons. Regardless of the  
412 perturbation-response data set, ChIP-exo always had more acceptable TFs than ChIP-chip (Fig.  
413 S5). However, five TFs had ChIP-exo data in four different growth conditions. We used the  
414 nitrogen-limited chemostat data as it gave the best results, however this may overestimate the  
415 agreement that would be found in a more typical scenario where ChIP-exo is performed in only  
416 one condition. After processing either the ZEV or TFKO perturbation-response data through  
417 NetProphet 2.0, all seven TFs were acceptable (Fig. S5). Thus, while the numbers of TFs are  
418 still small, this analysis suggests that ChIP-exo may yield better agreement with perturbation-  
419 response data than traditional ChIP.

420

#### 421 Transposon calling cards yields more acceptable TFs than traditional ChIP

422 Transposon calling cards is a method of determining TF binding locations by tethering a  
423 transposase to a TF, recovering the inserted transposons with their flanking sequences, and  
424 counting the insertions in a given genomic region. It does not require crosslinking, sonication, or  
425 affinity purification (see refs [24-26] for details). Here, we analyze both previously published [24]  
426 and new, previously unpublished calling cards data. Binding data from ChIP and Calling Cards  
427 were compared to perturbation-response data from TFKO and ZEV, using the 12 TFs present in  
428 all 4 data sets (Fig. 5B). In all comparisons, calling cards yielded substantially more acceptable  
429 TFs than ChIP. This is particularly impressive given that the calling cards experiments were  
430 carried out very different growth conditions from the ZEV experiments -- synthetic complete  
431 medium with galactose on agarose plates at room temperature versus rich medium with glucose  
432 in liquid culture at 30C. Figure 5B also shows that, holding all other factors constant, ZEV was  
433 always better than TFKO and post-processing by NetProphet was always beneficial. Lists of  
434 acceptable TFs and their bound and responsive targets for all calling cards analyses in Fig. 5B  
435 are provided as Supplemental Files S5-8.

436

437 Figure 5C shows the -log P-value of the most significant gene ontology (GO) term for the  
438 predicted targets of each TF we have calling cards data on, excluding terms that describe more  
439 than 300 or fewer than 3 genes. To highlight the progress reported here, results are shown for  
440 the best combination of experimental and analytic methods (DTO on calling cards data and  
441 NetProphet output after running on TFKO and ZEV 15, 45, and 90-minute samples) and for the  
442 simple intersection of bound and responsive genes using TFKO and ChIP-chip. For 10 of 12  
443 TFs, the best combination of methods had a stronger GO term P-value, and the differences  
444 were large. For 2 of 12 (Ino4 and Sfp1), simple intersection had the stronger P-value, but the

445 differences were smaller. The median  $-\text{Log}_{10}$  P-value for the best combination of methods was  
446 11.2, while that of simple intersection was 1.5. The best combination of methods assigned the  
447 top GO term to 117 target genes, whereas simple intersection assigned the top term to only 41  
448 genes. For most TFs, the most significant GO term had a clear relationship to the known  
449 function of the TF as described in the Saccharomyces Genome Database. This includes some  
450 cases where the term selected is an immediate parent of the most familiar term associated with  
451 the TF. For example, Gcr2 (Glycolysis Regulation 2) is known as a regulator of genes encoding  
452 glycolytic enzymes. Its most significant GO term is “ADP metabolic process”, annotating 13  
453 predicted Gcr2 targets, but 12 of those targets are also annotated with “Glycolytic process”, a  
454 child (subcategory) of “ADP metabolic process”. This can be seen in Figure S6, which shows  
455 the top 5 GO terms for each TF.

456  
457 Another way to look at the contributions of various methods is to plot the fraction of available  
458 TFs that are acceptable, combining TFKO and ZEV, using each combination of methods  
459 described here (Fig. 5D). Only 15 TFs are currently available for calling cards and either ZEV or  
460 TFKO (12 for both), but analyzing these with DTO and NetProphet results in a much larger  
461 fraction of TFs being acceptable. This includes TFs that are not thought to be active in the ZEV  
462 or TFKO growth conditions, such as Gal4, presumably because ZEV overexpression of Gal4  
463 significantly exceeds the number of Gal80 molecules available to bind and inactivate it.

464  
465 The combination of ZEV and calling cards greatly increases response rates  
466 We began this paper by observing that, using fixed threshold analysis of the TFKO and ChIP  
467 data, most binding appears to be non-functional. To revisit the question of functionality using  
468 ZEV and calling cards data, we plotted the fraction of bound genes that are responsive, as a  
469 function of binding strength rank. Figure 6A shows that, for the TF Leu3, the combination of  
470 calling cards and ZEV gives much higher response rates than any of the other three  
471 combinations -- ChIP-ZEV, calling cards-TFKO, or ChIP-TFKO -- regardless of binding strength.  
472 Nine out of the 10 mostly strongly bound and 48 out of 100 most strongly bound genes were  
473 responsive. To make the comparison between ZEV and TFKO fair, we fixed the number of  
474 Leu3-responsive genes in each data set to be the same. Thus, we labeled the 156 most  
475 strongly responsive genes in each data set as responsive. We chose 156 because it was the  
476 minimum of the numbers of genes that were significantly differentially expressed in the two data  
477 sets for Leu3. Although the number of responsive genes in each data set was the same, a  
478 larger fraction of the ZEV-responsive genes was bound, as compared to the TFKO-responsive  
479 genes. Figure 6B shows a similar plot of the average response rates at each binding threshold,  
480 across the 12 TFs for which we have all four combinations of data sets. Again, the combination  
481 of ZEV and calling cards gives higher response rates at all binding thresholds. On average, the  
482 response rate of the 10 most strongly bound genes is 56%. However, this is probably an  
483 underestimate of the true response rate, since the number of responsive genes for each TF was  
484 set to the minimum of the number in the TFKO and ZEV data sets. Individual rank response  
485 plots for all 11 other TFs present in all four data sets are shown in Figure S7.

486  
487 DISCUSSION  
488

489 The fundamental question behind this investigation is how best to map the direct functional  
490 targets of transcription factors. We found that the established method of assaying the DNA  
491 binding locations of TFs, chromatin immunoprecipitation, does not by itself effectively identify  
492 the direct functional targets of a TF, because most of the genes whose cis-regulatory DNA is  
493 bound by a TF are not functionally regulated by that TF. We found this to be the case for two  
494 yeast ChIP datasets as well as 68 ENCODE ChIP-Seq experiments in human K562 cells and 88  
495 ChIP-Seq experiments in human HEK293, consistent with previous reports based on different  
496 data sets. [15, 27, 28]

497  
498 If the problem is that most bound genes are not responsive, a natural solution would be to focus  
499 on those that are. That is, to take the intersection of the genes a TF binds and the genes that  
500 respond to perturbation of the TF as its direct functional targets. However, we proved that this  
501 procedure does not effectively identify the direct functional targets when the sets of bound and  
502 responsive genes are much larger than their intersection. The reason is that, when there are  
503 many genes with non-functional binding sites and many genes that respond to the perturbation  
504 because they are indirect targets, it is expected that some genes will be indirect targets with  
505 non-functional binding sites in their cis-regulatory DNA. These are not direct functional targets,  
506 yet they inhabit and contaminate the intersection of bound and responsive genes. As a result, it  
507 is not safe to assume that genes that are both bound and responsive are responsive because  
508 they are bound.

509  
510 We quantified this problem by setting minimal criteria for considering the genes that are bound  
511 and responsive to be likely direct functional targets. First, the intersection procedure must be  
512 able to achieve, in principle, 80% sensitivity with an expected false discovery rate of no more  
513 than 20%. Second, the intersection between the bound set and the responsive set must be  
514 greater than would be expected by chance, with a P-value of 0.01. We call a TF *acceptable* if it  
515 meets both those criteria. This designation does *not* guarantee that all or most of the TF's  
516 bound and responsive genes are direct functional targets, i.e. that they are responsive because  
517 they are bound. In particular, the 80-20 criterion is a lower bound on the expected FDR,  
518 carrying no implications of any upper bound. Furthermore, it does not guarantee a *unique*  
519 relationship between the bound and responsive sets of an acceptable TF -- the bound set of one  
520 TF can be acceptable when compared to the responsive set of another TF, so long as the two  
521 sets show concordance beyond what would be expected by chance. *Acceptable* simply means  
522 that there is no obvious red flag to prevent us from supposing that a good number of the TF's  
523 bound and responsive genes are direct functional targets. We found that, when combining ChIP  
524 data with steady-state perturbation-response data, the number of acceptable TFs was quite low.  
525 In both the yeast data and the human data, no more than 15% of the TFs assayed were  
526 acceptable. For the remainder, there is a clear red flag.

527  
528 So far, we have assumed that any protein that is designated as a TF in the ENCODE database  
529 and has bound targets in ChIP-Seq and responsive targets in RNA-Seq is a TF. However, when  
530 we compared these to a recent, exhaustive, manually curated list of human TFs [29], we found  
531 that 20 TFKD targets and 11 CRISPRi targets were not on the list. One possible explanation is  
532 that these are sequence-specific DNA binding proteins that should have been on the Lambert

533 list. A second possibility is that, although they do not bind DNA directly, they have ChIP-Seq  
534 peaks because they associate with proteins that do. A third possibility is that ChIP-Seq peaks  
535 do not necessarily reflect specific association with DNA, as suggested by a study in which green  
536 fluorescent protein (GFP) with a nuclear localization signal was found to generate thousands of  
537 robust ChIP peaks [30].

538

539 We identified four techniques that could increase the number of acceptable TFs substantially.

- 540 1. Measuring the transcriptional response a short time after inducing a perturbation by  
541 using a method such as ZEV. Overexpression by the ZEV system may also allow TFs  
542 with low activity in the experimental growth conditions to elicit a response from their  
543 target genes.
- 544 2. Using dual threshold optimization to set significance thresholds for binding and response  
545 data in a way that makes their intersection as significant as possible. This approach  
546 considers the two data types together, using each type to inform the threshold for the  
547 other, rather than considering each data type in isolation. Considering all the data  
548 should, logically, yield a better decision than only considering part of it, and we show that  
549 this approach does indeed yield more acceptable TFs.
- 550 3. Processing all the perturbation-response data together by using NetProphet 2.0, rather  
551 than considering the response to each perturbation in isolation from all the others.
- 552 4. Measuring TF binding location by using transposon calling cards rather than ChIP.

553 We are currently applying all these methods together to yeast and we expect the result to be a  
554 significantly expanded, high confidence map of the yeast TF network. As for mammalian cells,  
555 calling cards [31], dual threshold optimization, and NetProphet have all been shown to work. For  
556 TF activity perturbation, highly specific genome-targeting systems have been developed and  
557 tested with a variety activation and repression domains [32] and linked to small-molecule  
558 inducers [33, 34]. However, the prospects for obtaining ZEV-like perturbation and calling cards  
559 binding data on large numbers of mammalian TFs remain uncertain.

560

561 Other new technologies for measuring TF binding locations have shown great promise [35], but  
562 have not yet yielded a sufficiently large, systematic data set, with matched perturbation-  
563 response data, for comparison to ChIP and calling cards using the methods of this paper. One  
564 such technology is DAMID, in which a DNA-methyltransferase is tethered to a DNA-binding  
565 protein and changes in DNA methylation relative to a control are assayed to determine binding  
566 location [36-38]. Another is CUT&RUN, in which an endonuclease tethered to an antibody  
567 against a TF enters permeabilized nuclei and releases the DNA bound by the TF, which diffuses  
568 out of the cell and is recovered for sequencing [39-41]. A promising approach for measuring  
569 perturbation-response in mammalian cells is to transfect cells with a library of constructs  
570 encoding guide-RNAs that target a variety of TFs and then use single-cell RNA-Seq to identify  
571 the TF perturbed and measure the response. Variants of this general approach include Perturb-  
572 Seq [42, 43], CROP-Seq [44], and CRISP-Seq [45]. We expect that, as these technologies  
573 mature, they will be used to produce large systematic data sets that can be analyzed using the  
574 methods described here.

575

576 Even when we apply the best combination of analytic and experimental methods, a large  
577 fraction of the genes whose regulatory DNA is significantly bound by a TF binds do not respond  
578 to a perturbation of that TF. Such non-responsiveness could be caused by any of several  
579 mechanisms.

- 580 ● Insufficient occupancy -- rank response plots (Fig. 6) indicate that the most strongly  
581 bound sites are much more likely to be functional than sites that are less strongly (but  
582 still significantly) bound.
- 583 ● Saturation -- if a gene is already expressed at its maximum possible level and an  
584 activator of that gene is induced, no response will be seen. However, if other TFs were  
585 removed, lowering the expression level of the gene, it would respond to the induction.  
586 The same situation arises when a repressor of an unexpressed gene is induced or an  
587 activator of it is depleted.
- 588 ● Inactivity -- the TF may bind DNA even when the TF is in an inactive, or partially active,  
589 state. However, the ability of ZEV induction of Gal4 to activate galactose genes even in  
590 the absence of galactose and presence of glucose shows that overexpression can elicit  
591 a response to TFs that are not normally active.
- 592 ● Compensation -- the regulatory network as a whole may compensate for the change in  
593 TF activity in a way that damps the effect of the initial perturbation. Measuring responses  
594 shortly after the perturbation should reduce the prevalence of such compensation, but  
595 some mechanisms can compensate very quickly. A simple example would be two  
596 essentially equivalent TFs that can bind to the same sites, so that the effects of  
597 perturbing one TF are buffered by the other. This was shown to be a contributing factor  
598 in a comparison of the Harbison ChIP data to the TFKO data from Hu et al [15, 27].  
599 Another example would be a TF that activates a protein that covalently inactivates the  
600 TF, such as a kinase or phosphatase.
- 601 ● Override -- some regions of a genome may be shut down in a way that overrides the  
602 effects of TFs, even when the TFs can bind to the cis-regulatory DNA. For example, the  
603 transcribed region of a gene might be in inaccessible, tightly compacted DNA even  
604 though the cis-regulatory region remains somewhat accessible to TFs.
- 605 ● Synergistic regulation -- some TFs that are bound to cis-regulatory DNA may be active  
606 only where there is a binding site for a cofactor nearby.

607  
608 Regardless of the mechanism that renders a bound gene non-responsive, it remains the case  
609 that many binding sites are non-functional under the conditions tested, in the sense that the  
610 transcription rate of the associated gene is unaffected by the presence or absence of the TF.  
611 Currently, we do not know how much each of the factors listed above contributes to explaining  
612 why so many genes that are bound by a TF do not respond to a perturbation of that TF. For  
613 now, technical limitations of the available data sets may be a significant contributing factor.  
614 Once those have been mitigated by newer methods like transposon calling cards, we will be in a  
615 strong position to investigate the biological factors that explain the non-responsiveness of genes  
616 whose cis-regulatory DNA is bound by a TF. Determining the prevalence of each factor will  
617 bring the landscape of transcriptional regulation into much clearer focus.

618  
619 CONCLUSIONS

620 CHIP data on TF binding locations do not agree well with the set of genes that respond when  
621 the TF is genetically deleted (TFKO), confirming earlier findings. For most TFs, intersecting the  
622 bound and responsive genes is unlikely to be an accurate method of identifying direct functional  
623 targets. Agreement is improved by measuring binding using transposon calling cards and  
624 measuring response shortly after inducing the overexpression of a TF. When calling cards data  
625 become available for the entire set of yeast TFs, and ZEV induction-response experiments have  
626 been done in the same growth conditions, we will have a much clearer view of the network that  
627 regulates transcription in yeast.

628

## 629 METHODS

630 Detailed methods and data download links can be found in the online supplement.

631

## 632 LIST OF ABBREVIATIONS

- 633 ● CHIP: chromatin immunoprecipitation
- 634 ● CRISPRi: CRISPR interference -- a method of repressing gene expression
- 635 ● DF: direct functional
- 636 ● DTO: dual threshold optimization -- a method of setting significance thresholds for  
637 binding and perturbation response-data targeting the same TF
- 638 ● TF: DNA-binding transcription factor
- 639 ● TFBS: TF binding site
- 640 ● TFKD: TF knockdown, encompassing siRNA and shRNA knockdowns
- 641 ● TFKO: TF knockout

642

## 643 DECLARATIONS

644 Ethics approval and consent to participate: Not applicable. Consent for publication: Not  
645 applicable. Data availability: Data from the Harbison and Venters ChIP studies and Kemmeren  
646 TFKO studies are publicly available and can be obtained as described in refs. [14, 16, 23],  
647 respectively. ENCODE data can be obtained from the ENCODE web site:  
648 [www.encodeproject.org](http://www.encodeproject.org). ZEV data are available at <http://candid.research.calicolabs.com/>.  
649 Calling Cards data are available as Supplementary File 10 in the peer reviewed, published  
650 paper.

651

652 The authors declare that they have no competing interests.

653

## 654 FUNDING

655 MB was supported by NIH grants AI087794 and GM129126. YK was supported by matching  
656 funds for T32 HG000045 provided the McKelvey School of Engineering at Washington  
657 University. RM was supported by NIH grants GM123203, HG00975, and MH117070.

658

## 659 AUTHORS' CONTRIBUTIONS

660 MB conceived all computational analyses and drafted the ms. YK and NRP carried out the  
661 computational analyses, made figures, and drafted Methods. RSM conceived the ZEV  
662 experiments. BJW, GK, and RSM carried out ZEV experiments. PSR, XC, CS, and RM  
663 conceived, designed, and carried out the transposon calling cards studies.



664  
665  
666  
667  
668  
669  
670  
671  
672

**AUTHORS' INFORMATION**

YK is a computer science PhD student supervised by MB. NRP is a computer science master's student supervised by MB. CS is a postdoctoral fellow supervised by RM. PSR is a postbaccalaureate fellow supervised by CS and RM. XC is a staff scientist. RM is the Goldfarb Professor of Genetics at Washington University School of Medicine. RSM, BJW, and GK are employees of Calico Life Sciences LLC.

673 TABLES, BOXES AND FIGURES

674  
675  
676  
677  
678

| Data type             | Technology               | Species              | Proteins targeted | Targeted TFs analyzed | Genome assembly | Strain/Cell line | Publications                                             |
|-----------------------|--------------------------|----------------------|-------------------|-----------------------|-----------------|------------------|----------------------------------------------------------|
| Binding location      | ChIP-chip                | <i>S. cerevisiae</i> | 203               | 155                   | N/A             | W303             | Harbison, 2004                                           |
|                       | ChIP-chip                | <i>S. cerevisiae</i> | 200               | 36                    | N/A             | S288C            | Venters, 2011                                            |
|                       | ChIP-exo                 | <i>S. cerevisiae</i> | 12                | 12                    | R55, R64 (SGD)  | S288C            | Rhee, 2011; Rossi, 2018a; Rossi, 2018b; Bergenholm, 2018 |
|                       | Transposon calling cards | <i>S. cerevisiae</i> | 15                | 15                    | R61 (SGD)       | S288C            | Wang, 2012; Supplemental file S10                        |
|                       | ChIP-seq                 | <i>H. sapiens</i>    | 261               | 261                   | GRCh38          | K562             | Davis, 2018 (ENCODE)                                     |
|                       | ChIP-seq                 | <i>H. sapiens</i>    | 131               | 131                   | GRCh37          | HEK293           | Schmitges, 2016                                          |
| Perturbation response | TFKO                     | <i>S. cerevisiae</i> | 1,484             | 164                   | N/A             | S288C            | Kemmeren, 2014                                           |
|                       | ZEV TF induction         | <i>S. cerevisiae</i> | 201               | 139                   | N/A             | S288C            | Hackett, 2019                                            |
|                       | TFKD (shRNA, siRNA)      | <i>H. sapiens</i>    | 261               | 261                   | GRCh38          | K562             | Davis, 2018 (ENCODE)                                     |
|                       | CRISPRi                  | <i>H. sapiens</i>    | 96                | 96                    | GRCh38          | K562             | Davis, 2018 (ENCODE)                                     |
|                       | TF induction             | <i>H. sapiens</i>    | 80                | 80                    | GRCh37          | HEK293           | Schmitges, 2016                                          |

679  
680  
681  
682

Table 1. Data resources.

Box 1: Expected False Discovery Rate (FDR) of intersection algorithms

Intersection algorithms identify the direct functional targets of a TF as those whose promoters are bound by the TF in an assay such as ChIP-Seq and are responsive when the same TF is perturbed. A true direct functional (DF) target is responsive when the TF is perturbed *because it is bound by the TF*. The obvious alternative is that the binding site is non-functional and the gene is responsive because it is an indirect target of the TF. Another possible alternative is that the gene is a false positive of the binding or response assay.

We start by defining the following notation for any given TF:

$B$  the set of genes whose promoters are bound by the TF  
 $R$  the set of genes that are responsive when the TF is perturbed  
 $DF$  the set of direct functional targets of the TF  
 $G$  the set of all genes in the genome

The analyses below are based on a hypothesis that is best understood by first thinking about the non-functional binding sites of a TF and its indirect targets as being distributed randomly and independently across the genes that are not DF targets. In notation:

$$\Pr(X \in B \cap R | X \in \overline{DF}) = \Pr(X \in B | X \in \overline{DF}) \Pr(X \in R | X \in \overline{DF}),$$

That is, having a non-functional binding site for a TF and being an indirect target of the TF are unrelated – an indirect target is no more or less likely to have a non-functional binding site than any other gene. However, our proof does not require equality, just the inequality

$$\Pr(X \in B \cap R | X \in \overline{DF}) \geq \Pr(X \in B | X \in \overline{DF}) \Pr(X \in R | X \in \overline{DF}), \quad (1)$$

where  $X$  is a randomly chosen gene. That is, indirect targets and non-functional binding sites do not systematically avoid one another.

The sensitivity of the intersection algorithm is:

$$S_n = \frac{|DF \cap R_o \cap B_o|}{|DF|} \leq \frac{|R_o \cap B_o|}{|DF|}$$

where the subscript  $o$  emphasizes that we are referring to the actual observed sets of bound and responsive genes from some particular experiment. Thus,

$$|DF| \leq \frac{|R_o \cap B_o|}{S_n} \quad (2)$$

The expectation of the FDR, with respect to the random process that distributes non-functional binding sites and indirect targets, is

$$\begin{aligned} E[\text{FDR}] &= \Pr(\overline{DF} | B \cap R) \\ &= \Pr(B \cap R | \overline{DF}) \Pr(\overline{DF}) / \Pr(B \cap R) \\ &\geq \Pr(B | \overline{DF}) \Pr(R | \overline{DF}) \Pr(\overline{DF}) / \Pr(B \cap R) \end{aligned}$$

where  $\overline{DF}$  is the set complement of  $DF$  and the random variable  $X$  has been omitted for brevity.

We can estimate these probabilities by maximum likelihood from the observed bound and responsive sets,  $B_o$  and  $R_o$ , as follows.

$$\begin{aligned} \Pr(B | \overline{DF}) \Pr(R | \overline{DF}) \Pr(\overline{DF}) / \Pr(B \cap R) &\approx \frac{|B_o \cap \overline{DF}|}{|\overline{DF}|} \frac{|R_o \cap \overline{DF}|}{|\overline{DF}|} \frac{|\overline{DF}|}{|G|} \Big/ \frac{|B_o \cap R_o|}{|G|} \\ &= \frac{|B_o \cap \overline{DF}| |R_o \cap \overline{DF}|}{|\overline{DF}| |B_o \cap R_o|} \\ &\geq \frac{\max(0, |B_o| - |DF|) \max(0, |R_o| - |DF|)}{|\overline{DF}| |B_o \cap R_o|} \\ &\geq \frac{\max(0, |B_o| - |R_o \cap B_o| / S_n) \max(0, |R_o| - |R_o \cap B_o| / S_n)}{|\overline{DF}| |B_o \cap R_o|} \end{aligned}$$

Based on these estimates

$$E[\text{FDR}] \geq \frac{\max(0, |B_o| - |R_o \cap B_o| / S_n) \max(0, |R_o| - |R_o \cap B_o| / S_n)}{|G| |B_o \cap R_o|}$$

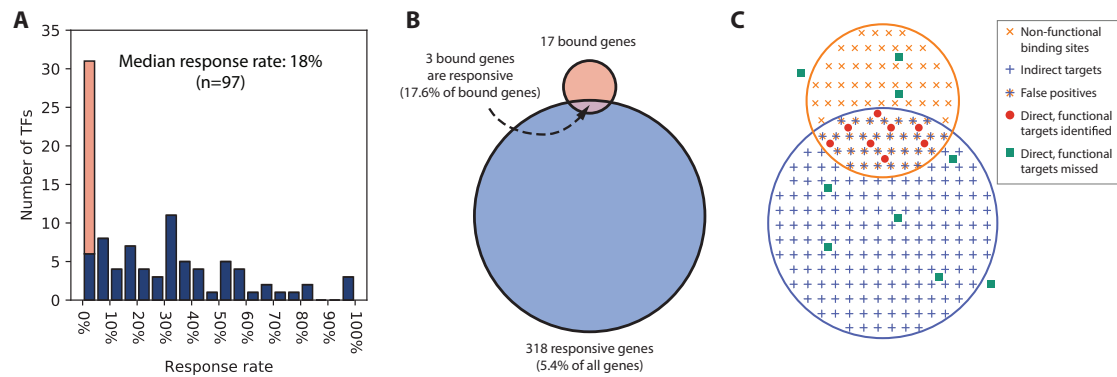

684  
685

686 Figure 1. (A) Distribution of the response rates of TFs (fraction of bound genes that respond to  
687 TF perturbation) in the Harbison binding and Kemmeren TFKO data sets. Stacked orange bar  
688 indicates the number of TFs with response rates of exactly 0. Binding threshold is  $p < 0.001$  and  
689 response threshold is  $p < 0.05$ , as recommended in the original publications, with no minimum  
690 fold change. (B) Median numbers of bound genes (17), perturbation-responsive genes (318),  
691 and intersection size (3), when comparing the ChIP-chip data to the TFKO perturbation-  
692 response data. Thresholds are as in panel A. (C) An illustration of the idea that non-functional  
693 binding sites will sometimes occur in the promoters of responsive, indirect targets by random  
694 chance.  
695

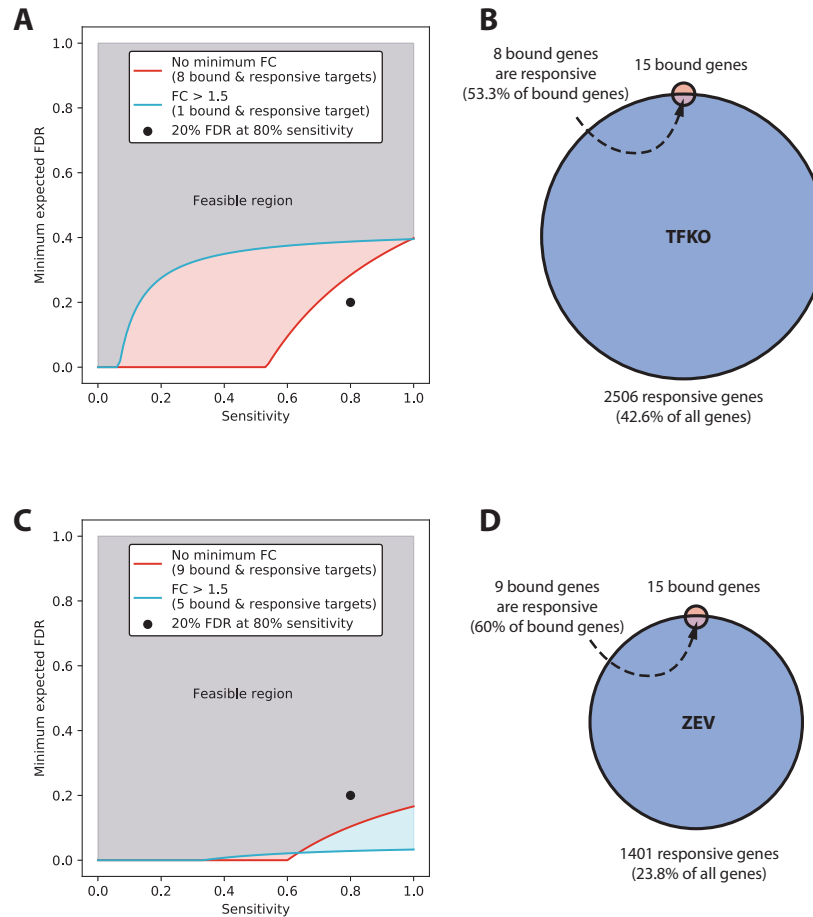

696

697

698 Figure 2. Analysis of Minimum expected false discovery rate (FDR). (A) Minimum expected FDR

699 as a function of sensitivity for TF Gln3, with moderate and tight thresholds for responsiveness,

700 when comparing ChIP to TFKO. 80% sensitivity with 20% FDR is not attainable at either

701 threshold, when comparing ChIP to TFKO. (B) The bound set, responsive set, and intersection

702 for Gln3, when comparing ChIP to TFKO. (C) Minimum expected FDR, as a function of

703 sensitivity, with moderate and tight thresholds for responsiveness, when comparing ChIP to

704 ZEV15. 80% sensitivity with 20% FDR is attainable at either threshold. (D) The bound set,

705 responsive set, and intersection for Gln3, when comparing ChIP to ZEV15.

706

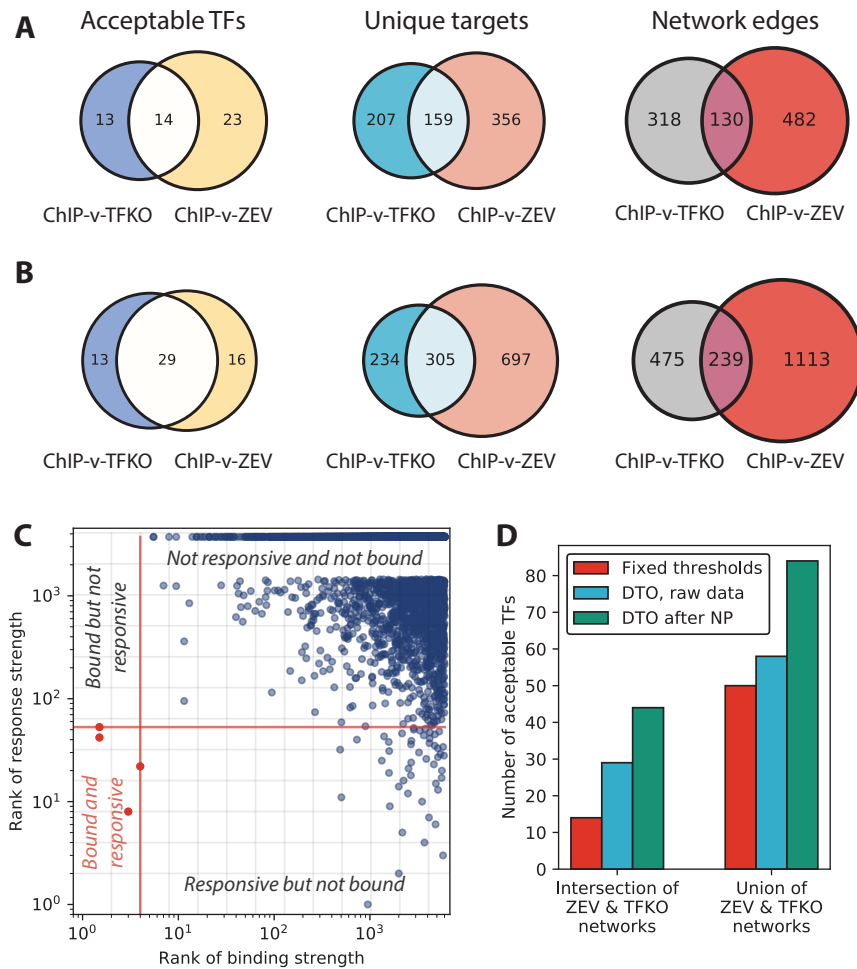

707  
708

709 Figure 3. (A) Numbers of acceptable TFs, unique target genes, and network edges, when  
710 comparing Harbison ChIP data to TFKO or ZEV15 response data. “Unique Targets” are genes  
711 that are in the bound-responsive intersection of an at least one acceptable TF and thus are  
712 plausible direct functional targets. Edges connect acceptable TFs to the genes in their bound-  
713 responsive intersection. These genes are not guaranteed to be direct functional targets. The  
714 ZEV15 response data yields more acceptable TFs, more regulated genes, and more regulatory  
715 edges. (B) Numbers of acceptable TFs and unique target genes for comparison of Harbison  
716 ChIP binding data to TFKO or ZEV15 response data, after dual threshold optimization. The  
717 requirement that the overlap between the bound and responsive targets be significantly greater  
718 than chance at  $P < 0.01$  was obtained by comparing the nominal hypergeometric P-value for the  
719 overlap to a null distribution obtained by running dual threshold optimization on 1,000 randomly  
720 permuted binding and response data sets. ZEV yields more acceptable TFs, regulated genes,  
721 and regulatory interactions than TFKO. (C) Illustration of DTO algorithm. Each dot represents  
722 one gene. Red lines indicate the chosen (optimal) thresholds for binding (vertical red line) and  
723 regulation (horizontal red line). The lower left quadrant, relative to the red lines, contains the

724 bound and responsive genes, which are presumed to be direct functional targets (red dots). The  
725 lower right quadrant contains genes that are judged to be responsive but not bound and the  
726 upper left quadrant contains genes that are judged to be bound but not responsive (in this case  
727 there are none). Gray lines indicate some of the other possible thresholds on binding or  
728 response and locations where the gray lines cross are possible combinations of binding and  
729 response thresholds, each of which is evaluated by the DTO algorithm. (D) Comparison of  
730 TFKO and ZEV15 networks derived from fixed thresholds, DTO on raw gene expression, and  
731 DTO on gene expression data processed by NetProphet 2.0. The use of DTO on the raw  
732 expression data (blue bars) increases the size of the networks, whether you focus on the  
733 intersection of the TFKO and ZEV networks (left bar grouping), or the union (right bar grouping).  
734 Post processing with NetProphet 2.0 (green bars) increases the number of acceptable TFs.  
735

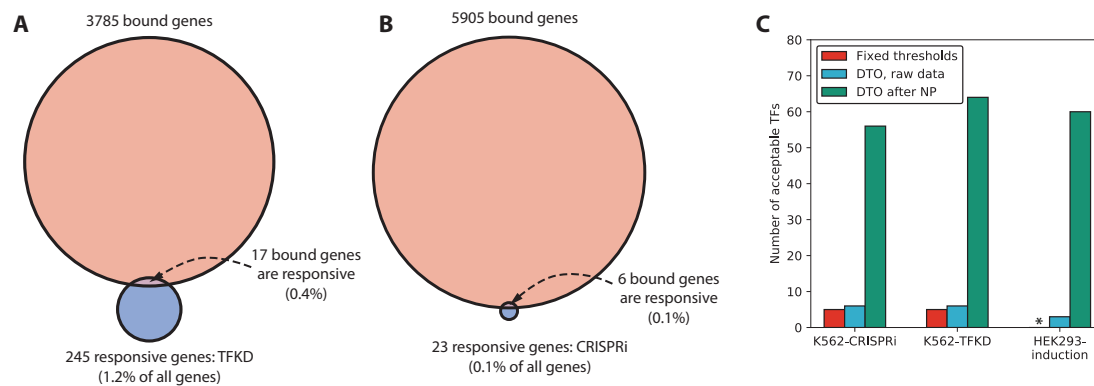

736  
737

738 Figure 4. (A) Medians of number of bound genes, number of perturbation-responsive genes,  
739 and number genes that are both bound and responsive, when comparing ENCODE K562 ChIP-  
740 Seq data to ENCODE TFKD data. Excludes TFs with either no bound genes or no responsive  
741 genes. Binding threshold is  $p < 0.05$  and response threshold is  $p < 0.05$  with no minimum fold  
742 change. (B) Comparison of ENCODE K562 ChIP-Seq data and ENCODE CRISPRi data, as in  
743 Panel A. (C) Comparison of human networks derived from fixed thresholds, dual threshold  
744 optimization (DTO) on raw gene expression, and DTO on gene expression data processed by  
745 NetProphet 2.0. No fixed threshold analysis for HEK293 is available for the lack of response p-  
746 value.

747



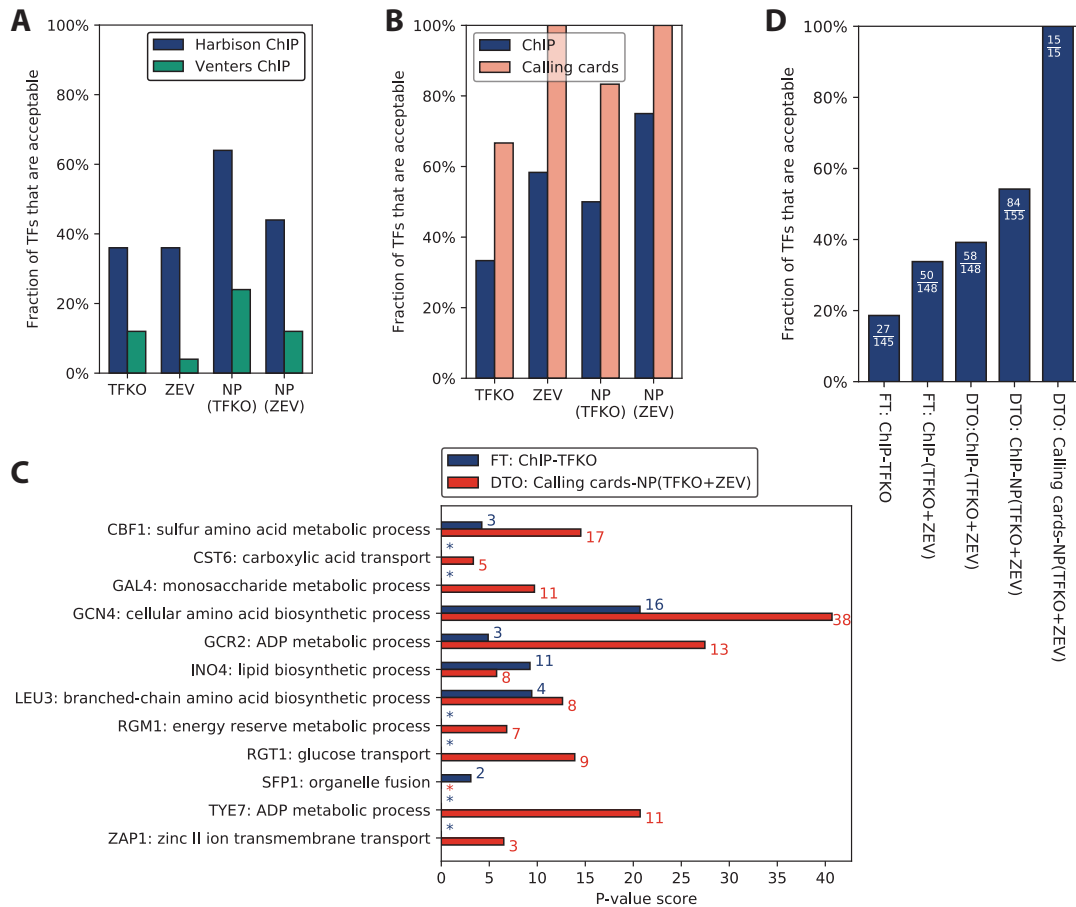

748  
749

750 Figure 5. (A) Number of acceptable TFs, comparing the Harbison ChIP and Venters ChIP data  
751 on the same 25 TFs. Regardless of the perturbation data set or the processing by NetProphet  
752 2.0, the Harbison ChIP data always yields more acceptable TFs. (B) Among the 12 TFs for  
753 which we have data in Harbison ChIP, calling cards, TFKO, and ZEV, the percentage that are  
754 acceptable. Regardless of the perturbation data set or processing by NetProphet 2.0, calling  
755 cards always yields more acceptable TFs. Holding all other factors constant, ZEV always yields  
756 more acceptable TFs than TFKO. NetProphet postprocessing always yields more acceptable  
757 TFs than raw differential expression for TFKO; for ZEV, the raw data already achieve 100%  
758 acceptable. (C) For each of the 12 TFs for which we have data in Harbison ChIP, calling cards,  
759 TFKO, and ZEV, the gene ontology (GO) term that is most strongly enriched in its targets.  
760 Targets are determined either by simple intersection of the bound and responsive genes in  
761 Harbison ChIP and TFKO data, using fixed thresholds (blue) or by dual threshold optimization  
762 on calling cards data and output from NetProphet 2.0 run on the TFKO and ZEV expression  
763 data (red). The colored numbers indicate the number of target genes annotated to the most  
764 significant GO term. Asterisk indicates no GO enrichment with  $P < 0.01$ . (D) Among all TFs for  
765 which the indicated analyses can be carried out, the percentage that are acceptable in either  
766 TFKO or ZEV expression data or both. The fraction shows the number of acceptable TFs over

767 the total number of TFs that could be analyzed. FT: Fixed threshold. DTO: Dual threshold  
768 optimization.  
769

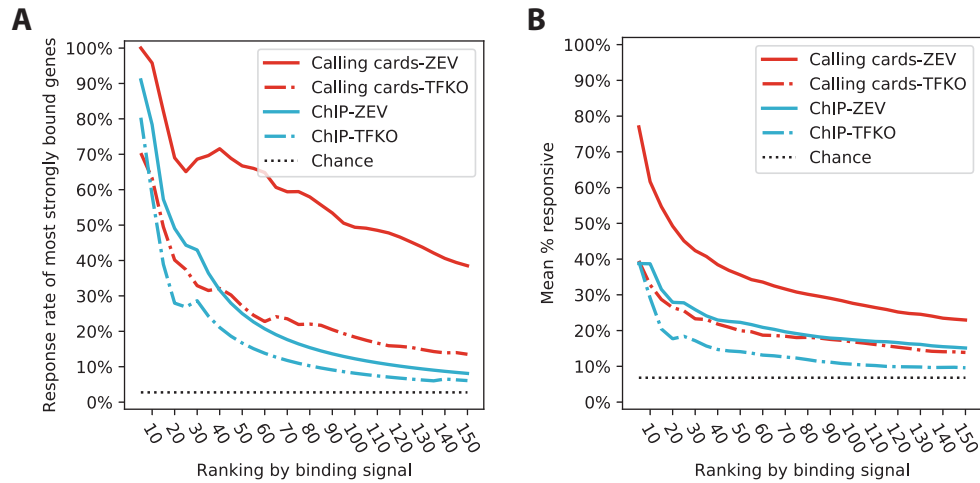

770

771

772 Figure 6. (A) The fraction of most strongly Leu3-bound genes that are responsive to Leu3  
773 perturbation, as a function of the number of most-strongly bound genes considered. (B) Same  
774 as (A), with response rates averaged across the 12 TFs for which Harbison ChIP, calling cards,  
775 TFKO, and ZEV data were available.

776

777  
778  
779  
780  
781  
782  
783  
784  
785  
786  
787  
788  
789  
790  
791  
792  
793  
794  
795  
796  
797  
798  
799  
800  
801  
802  
803  
804  
805  
806  
807  
808  
809  
810  
811  
812  
813  
814  
815  
816  
817  
818  
819  
820  
821  
822  
823  
824  
825  
826

## REFERENCES

1. Liao JC, Boscolo R, Yang YL, Tran LM, Sabatti C, Roychowdhury VP: **Network component analysis: reconstruction of regulatory signals in biological systems.** *Proc Natl Acad Sci U S A* 2003, **100**:15522-15527.
2. Tran LM, Brynildsen MP, Kao KC, Suen JK, Liao JC: **gNCA: a framework for determining transcription factor activity based on transcriptome: identifiability and numerical implementation.** *Metabolic engineering* 2005, **7**:128-141.
3. Boorsma A, Lu XJ, Zakrzewska A, Klis FM, Bussemaker HJ: **Inferring condition-specific modulation of transcription factor activity in yeast through regulon-based analysis of genomewide expression.** *PLoS One* 2008, **3**:e3112.
4. Balwiercz PJ, Pachkov M, Arnold P, Gruber AJ, Zavolan M, van Nimwegen E: **ISMARA: automated modeling of genomic signals as a democracy of regulatory motifs.** *Genome Res* 2014, **24**:869-884.
5. Michael DG, Maier EJ, Brown H, Gish SR, Fiore C, Brown RH, Brent MR: **Model-based transcriptome engineering promotes a fermentative transcriptional state in yeast.** *Proc Natl Acad Sci U S A* 2016, **113**:E7428-E7437.
6. Cahan P, Li H, Morris SA, Lummertz da Rocha E, Daley GQ, Collins JJ: **CellNet: network biology applied to stem cell engineering.** *Cell* 2014, **158**:903-915.
7. Rackham OJ, Firas J, Fang H, Oates ME, Holmes ML, Knaupp AS, Consortium F, Suzuki H, Nefzger CM, Daub CO, et al: **A predictive computational framework for direct reprogramming between human cell types.** *Nat Genet* 2016.
8. Brown JB, Celniker SE: **Lessons from modENCODE.** *Annu Rev Genomics Hum Genet* 2015, **16**:31-53.
9. Kudron MM, Victorsen A, Gevirtzman L, Hillier LW, Fisher WW, Vafeados D, Kirkey M, Hammonds AS, Gersch J, Ammouri H, et al: **The modERN Resource: Genome-Wide Binding Profiles for Hundreds of Drosophila and Caenorhabditis elegans Transcription Factors.** *Genetics* 2017.
10. Consortium EP: **An integrated encyclopedia of DNA elements in the human genome.** *Nature* 2012, **489**:57-74.
11. Sloan CA, Chan ET, Davidson JM, Malladi VS, Strattan JS, Hitz BC, Gabdank I, Narayanan AK, Ho M, Lee BT, et al: **ENCODE data at the ENCODE portal.** *Nucleic Acids Res* 2016, **44**:D726-732.
12. Schmitges FW, Radovani E, Najafabadi HS, Barazandeh M, Campitelli LF, Yin Y, Jolma A, Zhong G, Guo H, Kanagalingam T, et al: **Multiparameter functional diversity of human C2H2 zinc finger proteins.** *Genome Res* 2016, **26**:1742-1752.
13. Kang Y, Liow HH, Maier EJ, Brent MR: **NetProphet 2.0: Mapping Transcription Factor Networks by Exploiting Scalable Data Resources.** *Bioinformatics* 2017, **34**:249-257.
14. Harbison CT, Gordon DB, Lee TI, Rinaldi NJ, Macisaac KD, Danford TW, Hannett NM, Tagne JB, Reynolds DB, Yoo J, et al: **Transcriptional regulatory code of a eukaryotic genome.** *Nature* 2004, **431**:99-104.
15. Hu Z, Killion PJ, Iyer VR: **Genetic reconstruction of a functional transcriptional regulatory network.** *Nat Genet* 2007, **39**:683-687.
16. Kemmeren P, Sameith K, van de Pasch LA, Benschop JJ, Lenstra TL, Margaritis T, O'Duibhir E, Apweiler E, van Wageningen S, Ko CW, et al: **Large-scale genetic perturbations reveal regulatory networks and an abundance of gene-specific repressors.** *Cell* 2014, **157**:740-752.

- 827 17. Hackett SR, Baltz EA, Coram M, Wranik BJ, Kim G, Baker A, Fan M, Berndl M, Mclsaac  
828 RS: **Time-resolved genome-scale profiling reveals a causal expression network.**  
829 *BioRxiv* 2019.
- 830 18. Mclsaac RS, Oakes BL, Botstein D, Noyes MB: **Rapid synthesis and screening of**  
831 **chemically activated transcription factors with GFP-based reporters.** *J Vis Exp*  
832 2013:e51153.
- 833 19. Mclsaac RS, Gibney PA, Chandran SS, Benjamin KR, Botstein D: **Synthetic biology**  
834 **tools for programming gene expression without nutritional perturbations in**  
835 ***Saccharomyces cerevisiae*.** *Nucleic Acids Res* 2014, **42**:e48.
- 836 20. Mclsaac RS, Silverman SJ, McClean MN, Gibney PA, Macinskas J, Hickman MJ, Petti  
837 AA, Botstein D: **Fast-acting and nearly gratuitous induction of gene expression and**  
838 **protein depletion in *Saccharomyces cerevisiae*.** *Mol Biol Cell* 2011, **22**:4447-4459.
- 839 21. Gilbert LA, Horlbeck MA, Adamson B, Villalta JE, Chen Y, Whitehead EH, Guimaraes C,  
840 Panning B, Ploegh HL, Bassik MC, et al: **Genome-Scale CRISPR-Mediated Control of**  
841 **Gene Repression and Activation.** *Cell* 2014, **159**:647-661.
- 842 22. Fishilevich S, Nudel R, Rappaport N, Hadar R, Plaschkes I, Iny Stein T, Rosen N, Kohn  
843 A, Twik M, Safran M, et al: **GeneHancer: genome-wide integration of enhancers and**  
844 **target genes in GeneCards.** *Database (Oxford)* 2017, **2017**.
- 845 23. Venters BJ, Wachi S, Mavrich TN, Andersen BE, Jena P, Sinnamon AJ, Jain P, Roller  
846 NS, Jiang C, Hemeryck-Walsh C, Pugh BF: **A comprehensive genomic binding map**  
847 **of gene and chromatin regulatory proteins in *Saccharomyces*.** *Mol Cell* 2011,  
848 **41**:480-492.
- 849 24. Wang H, Mayhew D, Chen X, Johnston M, Mitra RD: **Calling Cards enable**  
850 **multiplexed identification of the genomic targets of DNA-binding proteins.**  
851 *Genome Res* 2011, **21**:748-755.
- 852 25. Ryan O, Shapiro RS, Kurat CF, Mayhew D, Baryshnikova A, Chin B, Lin ZY, Cox MJ,  
853 Vizeacoumar F, Cheung D, et al: **Global gene deletion analysis exploring yeast**  
854 **filamentous growth.** *Science* 2012, **337**:1353-1356.
- 855 26. Mayhew D, Mitra RD: **Transposon Calling Cards.** *Cold Spring Harb Protoc* 2016,  
856 **2016**:pdb top077776.
- 857 27. Gitter A, Siegfried Z, Klutstein M, Fornes O, Oliva B, Simon I, Bar-Joseph Z: **Backup in**  
858 **gene regulatory networks explains differences between binding and knockout**  
859 **results.** *Mol Syst Biol* 2009, **5**:276.
- 860 28. Cusanovich DA, Pavlovic B, Pritchard JK, Gilad Y: **The functional consequences of**  
861 **variation in transcription factor binding.** *PLoS genetics* 2014, **10**:e1004226.
- 862 29. Lambert SA, Jolma A, Campitelli LF, Das PK, Yin Y, Albu M, Chen X, Taipale J, Hughes  
863 TR, Weirauch MT: **The Human Transcription Factors.** *Cell* 2018, **172**:650-665.
- 864 30. Teytelman L, Thurtle DM, Rine J, van Oudenaarden A: **Highly expressed loci are**  
865 **vulnerable to misleading ChIP localization of multiple unrelated proteins.** *Proc Natl*  
866 *Acad Sci U S A* 2013, **110**:18602-18607.
- 867 31. Wang H, Mayhew D, Chen X, Johnston M, Mitra RD: **"Calling cards" for DNA-binding**  
868 **proteins in mammalian cells.** *Genetics* 2012, **190**:941-949.
- 869 32. Waryah CB, Moses C, Arooj M, Blancafort P: **Zinc Fingers, TALEs, and CRISPR**  
870 **Systems: A Comparison of Tools for Epigenome Editing.** *Methods Mol Biol* 2018,  
871 **1767**:19-63.
- 872 33. Oakes BL, Nadler DC, Flamholz A, Fellmann C, Staahl BT, Doudna JA, Savage DF:  
873 **Profiling of engineering hotspots identifies an allosteric CRISPR-Cas9 switch.** *Nat*  
874 *Biotechnol* 2016, **34**:646-651.
- 875 34. Kundert K, Lucas JE, Watters KE, Fellmann C, Ng AH, Heineike BM, Fitzsimmons CM,  
876 Oakes BL, Savage DF, El-Samad H, et al: **Controlling CRISPR-Cas9 with ligand-**  
877 **activated and ligand-deactivated sgRNAs.** *bioRxiv* 2019.

- 878 35. Policastro RA, Zentner GE: **Enzymatic methods for genome-wide profiling of protein**  
879 **binding sites.** *Brief Funct Genomics* 2018, **17**:138-145.
- 880 36. van Steensel B, Henikoff S: **Identification of in vivo DNA targets of chromatin**  
881 **proteins using tethered dam methyltransferase.** *Nat Biotechnol* 2000, **18**:424-428.
- 882 37. Hass MR, Liow HH, Chen X, Sharma A, Inoue YU, Inoue T, Reeb A, Martens A,  
883 Fulbright M, Raju S, et al: **SpDamID: Marking DNA Bound by Protein Complexes**  
884 **Identifies Notch-Dimer Responsive Enhancers.** *Mol Cell* 2015, **59**:685-697.
- 885 38. Tosti L, Ashmore J, Tan BSN, Carbone B, Mistri TK, Wilson V, Tomlinson SR, Kaji K:  
886 **Mapping transcription factor occupancy using minimal numbers of cells in vitro**  
887 **and in vivo.** *Genome Res* 2018, **28**:592-605.
- 888 39. Skene PJ, Henikoff S: **An efficient targeted nuclease strategy for high-resolution**  
889 **mapping of DNA binding sites.** *Elife* 2017, **6**.
- 890 40. Skene PJ, Henikoff JG, Henikoff S: **Targeted in situ genome-wide profiling with high**  
891 **efficiency for low cell numbers.** *Nat Protoc* 2018, **13**:1006-1019.
- 892 41. Hainer SJ, Fazio TG: **High-Resolution Chromatin Profiling Using CUT&RUN.** *Curr*  
893 *Protoc Mol Biol* 2019, **126**:e85.
- 894 42. Dixit A, Parnas O, Li B, Chen J, Fulco CP, Jerby-Arnon L, Marjanovic ND, Dionne D,  
895 Burks T, Raychowdhury R, et al: **Perturb-Seq: Dissecting Molecular Circuits with**  
896 **Scalable Single-Cell RNA Profiling of Pooled Genetic Screens.** *Cell* 2016, **167**:1853-  
897 1866 e1817.
- 898 43. Adamson B, Norman TM, Jost M, Cho MY, Nunez JK, Chen Y, Villalta JE, Gilbert LA,  
899 Horlbeck MA, Hein MY, et al: **A Multiplexed Single-Cell CRISPR Screening Platform**  
900 **Enables Systematic Dissection of the Unfolded Protein Response.** *Cell* 2016,  
901 **167**:1867-1882 e1821.
- 902 44. Datlinger P, Rendeiro AF, Schmidl C, Krausgruber T, Traxler P, Klughammer J,  
903 Schuster LC, Kuchler A, Alpar D, Bock C: **Pooled CRISPR screening with single-cell**  
904 **transcriptome readout.** *Nat Methods* 2017, **14**:297-301.
- 905 45. Jaitin DA, Weiner A, Yofe I, Lara-Astiaso D, Keren-Shaul H, David E, Salame TM, Tanay  
906 A, van Oudenaarden A, Amit I: **Dissecting Immune Circuits by Linking CRISPR-**  
907 **Pooled Screens with Single-Cell RNA-Seq.** *Cell* 2016, **167**:1883-1896 e1815.
- 908
